# Supplementary material for: Confining Sb2Se3 nanorod yolk in a mesoporous carbon shell with an in-built buffer space for stable Li-ion batteries
Source: Royal Society of Chemistry journal article supplement (doi:10.1039/d0ta11204f), 2020-12-29
Supplement: d0ta11204f1.pdf [file d0ta11204f1.pdf]

## Supporting Information

### **Confining $\text{Sb}_2\text{Se}_3$ nanorod yolk in mesoporous carbon shell with an in-built buffer space for stable Li-ion batteries**

Yingmeng Zhang<sup>1</sup>, Shaojun Li<sup>1</sup>, Lele Cheng<sup>1</sup>, Yongliang Li<sup>1</sup>, Xiangzhong Ren<sup>1</sup>,  
Peixin Zhang<sup>1</sup>, Lingna Sun<sup>1\*</sup>, and Hui Ying Yang<sup>2\*</sup>

<sup>1</sup>College of Chemistry and Environmental Engineering, Shenzhen University,  
Shenzhen, Guangdong 518060, P.R. China

<sup>2</sup>Pillar of Engineering Product Development, Singapore University of Technology and  
Design, 8 Somapah Road, 487372, Singapore.

Corresponding author:

Lingna Sun, Email: [sunln@szu.edu.cn](mailto:sunln@szu.edu.cn), Tel: +86-755-26538657

Hui Ying Yang, E-mail: [yanghuiying@sutd.edu.sg](mailto:yanghuiying@sutd.edu.sg)

## Experimental

### Material Synthesis

All the materials and chemicals used in this study were of analytical grade and directly used as received from the Aladdin manufacturers.

#### *Synthesis of Sb<sub>2</sub>Se<sub>3</sub> nanorods.*

Sb<sub>2</sub>Se<sub>3</sub> nanorods were synthesized through a facile solvothermal method. Typically, 2 mmol of SbCl<sub>3</sub> was added into 60 mL of poly (ethylene glycol)-200 (PEG-200) and stirred for 2 h. Separately, the hydrazine hydrate-Se solution prepared by mixing 4 mmol of Se and 10 mL of hydrazine hydrate (N<sub>2</sub>H<sub>4</sub>•H<sub>2</sub>O, 80wt%). The solution was added dropwise into the above organic mixture and continuously stirred for 4 h. Then, the mixed solution was transferred into a 100 mL Teflon-lined stainless-steel autoclave, sealed and maintained at 200 °C for 12 h. Finally, after cooling down to room temperature, the as-prepared product of Sb<sub>2</sub>Se<sub>3</sub> nanorods, were collected by centrifugation and washed with deionized water and ethanol for three times before vacuum drying overnight at 60 °C.

#### *Synthesis of Sb<sub>2</sub>Se<sub>3</sub>@SiO<sub>2</sub> core-shell nanorods*

In a typical synthesis, 0.25 g of Sb<sub>2</sub>Se<sub>3</sub> nanorods were dispersed into a mixture of isopropanol (97 mL), deionized water (9 mL), and ammonia (5 mL, 25wt%) by sonication. After ultrasonic dispersion for 10 min, 0.1 mL tetraethyl orthosilicate (TEOS) was added to the above solution. Then the dispersion was further stirred for 2 h at 40 °C. Afterwards, the core-shell Sb<sub>2</sub>Se<sub>3</sub>@SiO<sub>2</sub> nanorods were obtained after centrifugation and washing with ethanol several times.

#### *Synthesis of Sb<sub>2</sub>Se<sub>3</sub>@Void@C yolk-shell nanorods*

The 0.2 g of as-prepared Sb<sub>2</sub>Se<sub>3</sub>@SiO<sub>2</sub> nanorods and 0.115 g of cetyltrimethylammonium bromide (CTAB) were added into a mixture with 7 mL of deionized water and 14 mL of alcohol. After 0.5 h ultra-sonication and 0.5 h stirring, 0.0175 g of resorcinol and 0.05 mL of ammonia (25wt%) were added sequentially. The mixture in the beaker was stirred for an additional 0.5 h at room temperature and then 0.06 mL of formaldehyde was finally added. The above mixture was continually stirred for 12 h, the precipitates were obtained and washed with water and ethanol several times, and dried at 60 °C overnight. Sb<sub>2</sub>Se<sub>3</sub>@Void@C yolk-shell nanorods were obtained after carbonization at 500 °C under argon for 3 h and removal of silica by 8wt% hydrofluoric acid

(HF) solution for 12 h.

### *Synthesis of Sb<sub>2</sub>Se<sub>3</sub>@C core-shell nanorods*

The Sb<sub>2</sub>Se<sub>3</sub>@C core-shell nanorods were also prepared for comparison in electrochemical performance. Similarly, 0.2 g of Sb<sub>2</sub>Se<sub>3</sub> nanorods were directly reacted with resorcinol and formaldehyde, instead of SiO<sub>2</sub> pre-coating and afterwards HF etching.

### **Material characterization**

Field-emission scanning electron microscopy (FE-SEM, JSM-7800F & TEAM Octane Plus, 10 kV, Japan) was used to characterize the morphology and size of the obtained samples. Transmission electron microscopy (TEM, JEM-2100 and X-Max 80, 200-300 kV, Japan) was performed to observe the internal structure of the sample, the lattice parameters and the elements. X-ray diffraction was performed on a PANalytical X'pert PRO X-ray diffractometer (XRD, PANalytical Empyrean, Netherlands) with a Cu-K $\alpha$  radiation at 45 kV and 40 mA. The chemical states and elements in the samples were identified by X-ray photoelectron spectroscopy (XPS, Thermo Scientific K-Alpha<sup>+</sup>, UK). Thermogravimetric analysis (TGA, Q50, Germany) was performed in a temperature range of 30-800 °C with a heating rate of 10 °C min<sup>-1</sup> in air. Raman spectroscopy (Renishaw inVia) is a technique to detect the confusion and defect degree of material. Specific surface area and pore size distributions were obtained by using the Brunauer-Emmett-Teller method (BET, NOVA1200e).

### **Electrochemical measurements**

The active electrode material, acetylene black and carboxymethyl cellulose (CMC) were mixed in deionized water with a weight ratio of 8:1:1, which was coated directly on Cu foil and dried at 60 °C under vacuum overnight. The prepared electrode was cut into discs with diameter of 14 mm, and the typical mass loading is about 1.0 mg cm<sup>-2</sup>. The electrochemical performance was investigated by using CR2032 coin-type cell. The metallic lithium foil and Celgard polymer membrane were used as the counter electrode and separator, respectively. The electrolyte was 1 M LiPF<sub>6</sub> in EC/DMC/EMC (1:1:1 by volume ratio). The charge-discharge tests were performed at a potential range of 0.01-3.0 V using a LAND CT2001A instrument (Wuhan, China). Cyclic voltammetry (CV) was measured at a scan rate of 0.2 mV s<sup>-1</sup> between 0.01 and 3 V using an electrochemical station (CHI760E, China). The electrochemical impedance spectroscopy (EIS) was collected by CHI760E electrochemical station in the frequency range of 100 kHz to 0.01 Hz,

which was obtained at an AC potential amplitude of 5 mV around the open circuit before the electrochemical performance testing. The mass loading of the  $\text{Sb}_2\text{Se}_3@\text{Void}@C$  yolk-shell nanorods was calculated based on the total mass of the composite including the carbon shell.

### **In situ XRD measurements**

In situ XRD measurements were performed in the Swagelok-type cell at current density of  $100 \text{ mA g}^{-1}$  within a potential window from 0.01 to 3.0 V. The active electrode material mixed with acetylene black and CMC in a weight ratio of 8:1:1, was coated directly on Beryllium (Be) foil and dried at  $60 \text{ }^\circ\text{C}$  under vacuum overnight. The electrode was assembled in the glove-box with a Swagelok-type cell, which was connected to the LAND CT2001A battery testing system during the in situ XRD measurements.

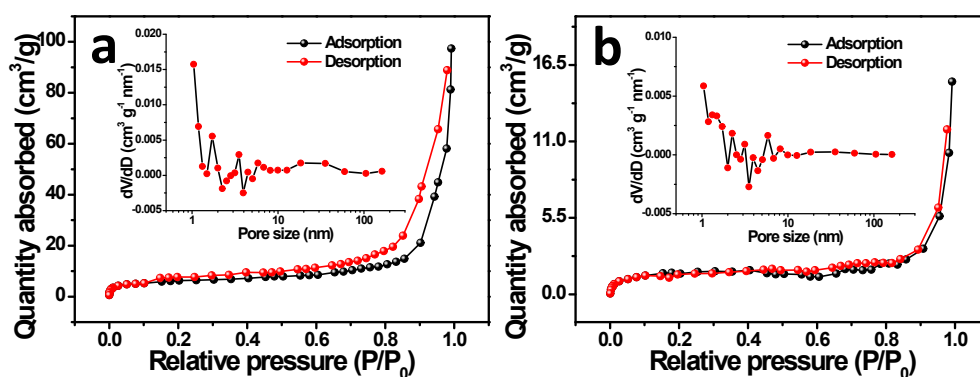

**Figure S1.** N<sub>2</sub> adsorption/desorption isotherms and the corresponding pore size distribution of (a) Sb<sub>2</sub>Se<sub>3</sub>@Void@C and (b) Sb<sub>2</sub>Se<sub>3</sub>.

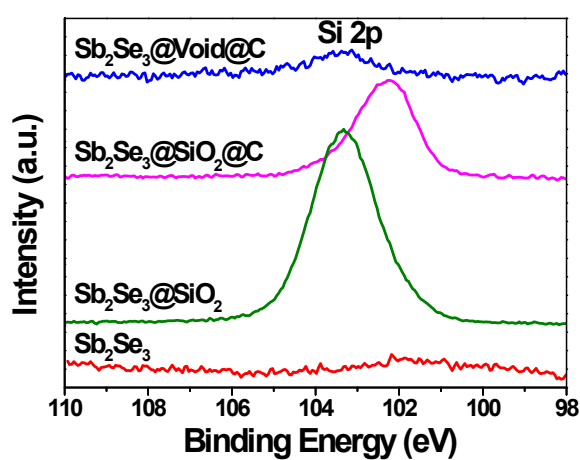

**Figure S2.** Si 2p core level XPS spectra of the pristine Sb<sub>2</sub>Se<sub>3</sub>, precursor Sb<sub>2</sub>Se<sub>3</sub>@SiO<sub>2</sub>, intermediate Sb<sub>2</sub>Se<sub>3</sub>@SiO<sub>2</sub>@C and final Sb<sub>2</sub>Se<sub>3</sub>@Void@C composite samples.

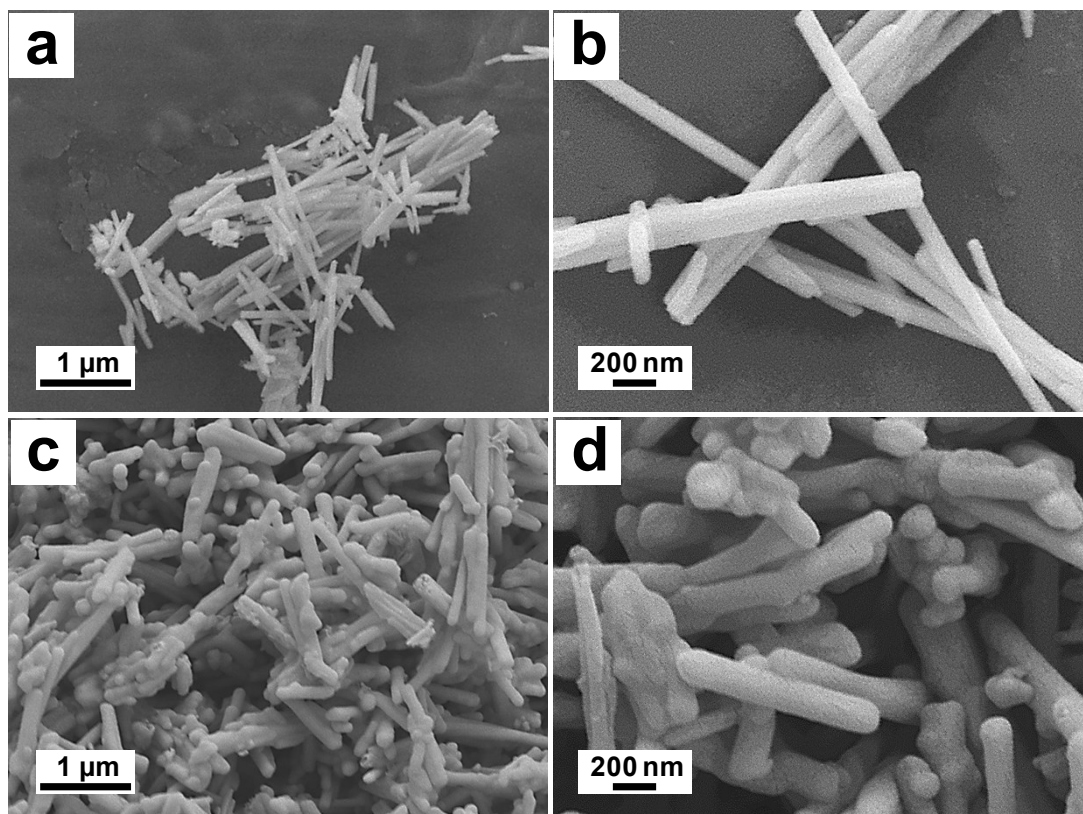

**Figure S3.** FESEM images of the obtained samples: (a, b) precursor  $\text{Sb}_2\text{Se}_3@\text{SiO}_2$  and (c, d) intermediate  $\text{Sb}_2\text{Se}_3@\text{SiO}_2@\text{C}$ .

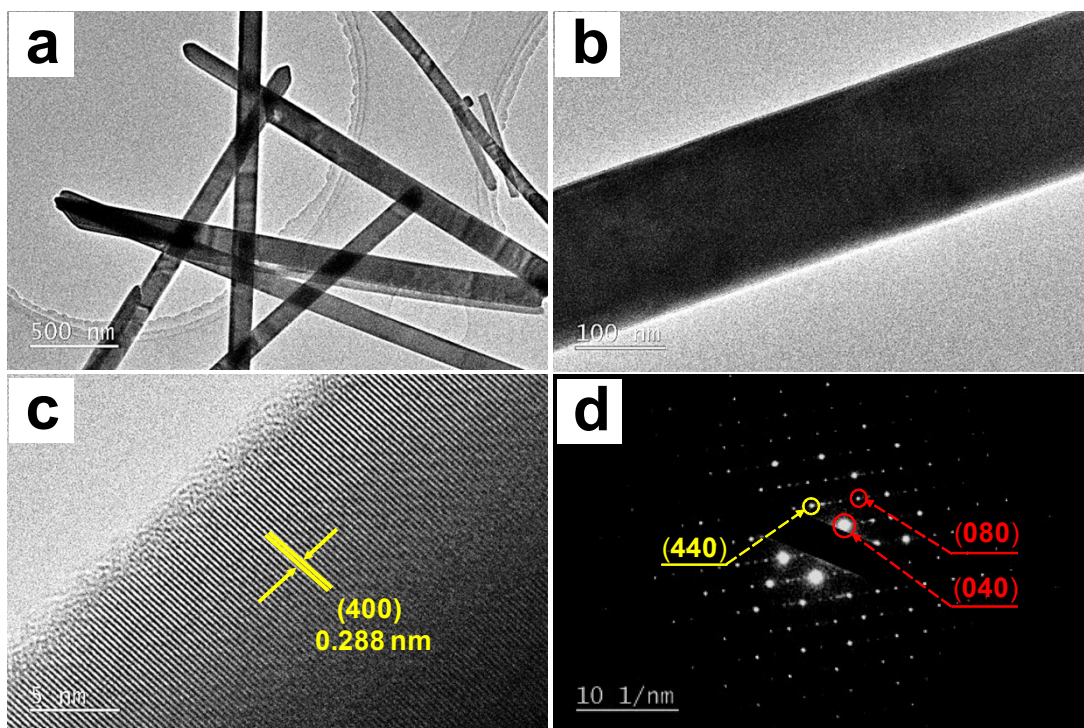

**Figure S4.** (a, b) TEM images and (c) HRTEM image for the  $\text{Sb}_2\text{Se}_3$  sample; (d) the corresponding selected area electron diffraction (SAED) pattern.

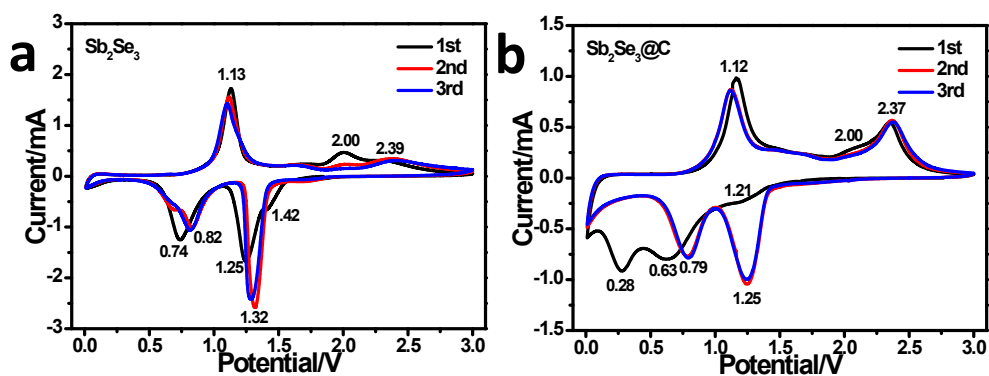

**Figure S5.** CV curves for the first 3 cycles at a scan rate of  $0.2 \text{ mV s}^{-1}$  in the voltage range of 0.01-3.0 V for the pristine  $\text{Sb}_2\text{Se}_3$  (a) and comparative  $\text{Sb}_2\text{Se}_3@\text{C}$  (b) samples.

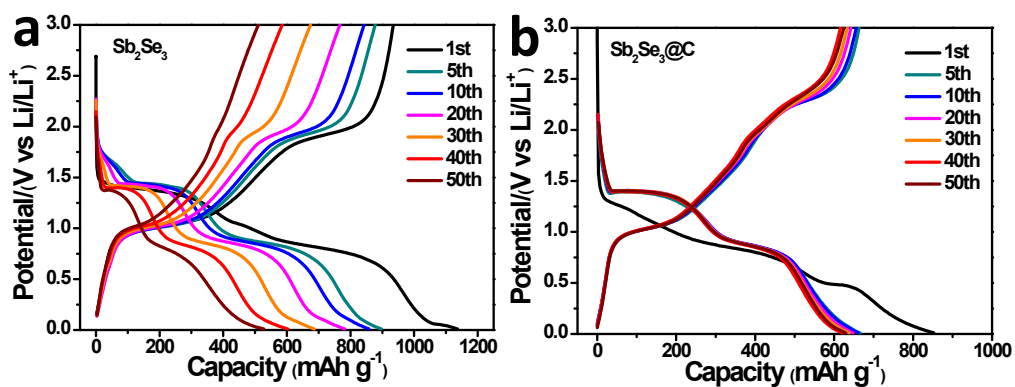

**Figure S6.** Charge/discharge profiles at a current density of  $0.2 \text{ A g}^{-1}$  for the pristine  $\text{Sb}_2\text{Se}_3$  (a) and comparative  $\text{Sb}_2\text{Se}_3@\text{C}$  (b) samples.



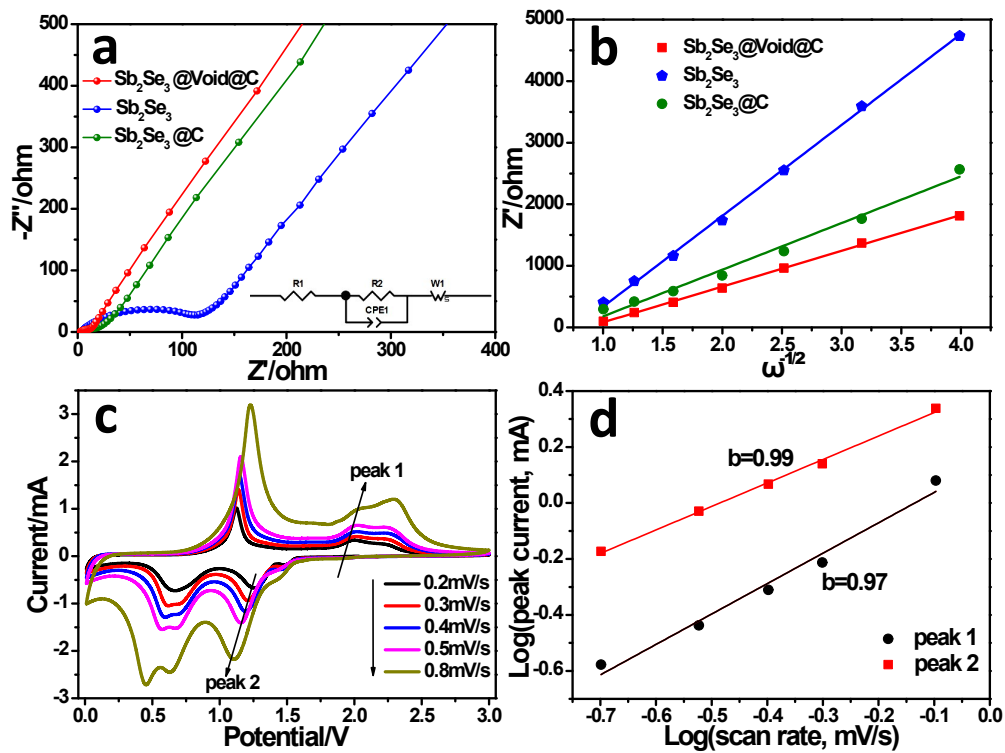

**Figure S7.** (a) Nyquist plots and (b)  $Z'$  vs  $\omega^{-1/2}$  in the low-frequency regions of  $\text{Sb}_2\text{Se}_3@Void@C$ ,  $\text{Sb}_2\text{Se}_3$  and  $\text{Sb}_2\text{Se}_3@C$ ; (c) CV curves at different scan rates and (d) plots for  $\log(i)$  versus  $\log(v)$  (peak current,  $i$ ; scanning rate,  $v$ ) for  $\text{Sb}_2\text{Se}_3@Void@C$ .

**Table S1.** Comparison of the performance between yolk-shell  $\text{Sb}_2\text{Se}_3$  nanorods with other reported  $\text{Sb}_2\text{Se}_3$  studies as anode materials for LIBs

| Samples                                       | Cycling                          |        | Cycling                              |                                  | Rate                                 | Rate | Ref. |
|-----------------------------------------------|----------------------------------|--------|--------------------------------------|----------------------------------|--------------------------------------|------|------|
|                                               | current<br>( $\text{A g}^{-1}$ ) | Cycles | capacity<br>( $\text{mA h g}^{-1}$ ) | current<br>( $\text{A g}^{-1}$ ) | capacity<br>( $\text{mA h g}^{-1}$ ) |      |      |
| $\text{Sb}_2\text{Se}_3@\text{Void}@C$        | 0.2                              | 100    | 658.6                                | 2.0                              | 625.3                                | This | work |
|                                               |                                  |        |                                      | 3.0                              | 594.7                                |      |      |
| $\text{Sb}_2\text{Se}_3/\text{rGO}$           | 0.1                              | 100    | 430                                  | 1.0                              | 247                                  | [1]  |      |
| $\text{Sb}_2\text{Se}_3$ nanowires            | 0.1                              | 50     | 650.2                                | 2.0                              | 389.5                                | [2]  |      |
| Amorphous $\text{Sb}_2\text{Se}_3/C$          | 0.1                              | 100    | 662                                  | 1.95                             | 623                                  | [3]  |      |
| $\text{Sb}_2\text{Se}_3$ nanowire<br>membrane | 0.1                              | 50     | 584                                  | 1.6                              | 255                                  | [4]  |      |
| $\text{Sb}_2\text{Se}_3$ nanorods             | 0.067                            | 100    | 230                                  | 0.67                             | 120                                  | [5]  |      |
| $\text{Ge}_2\text{Sb}_2\text{Se}_5$ glass     | 0.424                            | 100    | 626                                  | 0.848                            | 554                                  | [6]  |      |
| $\text{Sb}_2\text{Se}_3@\text{C}$ nanofibers  | 0.1                              | 100    | 625                                  | 2.0                              | 400                                  | [7]  |      |

**Table S2.**  $R_2$ ,  $\sigma$  and  $D_{\text{Li}^+}$  values for the  $\text{Sb}_2\text{Se}_3@\text{Void}@C$ ,  $\text{Sb}_2\text{Se}_3$  and  $\text{Sb}_2\text{Se}_3@\text{C}$  electrodes

|                                        | $R_2$ ( $\Omega$ ) | $\sigma$ ( $\Omega \text{ cm}^2\text{s}^{-0.5}$ ) | $D_{\text{Li}^+}$ ( $\text{cm}^2\text{s}^{-1}$ ) |
|----------------------------------------|--------------------|---------------------------------------------------|--------------------------------------------------|
| $\text{Sb}_2\text{Se}_3@\text{Void}@C$ | 16                 | 580.8                                             | $4.8 \times 10^{-16}$                            |
| $\text{Sb}_2\text{Se}_3$               | 134.4              | 1476.4                                            | $7.6 \times 10^{-17}$                            |
| $\text{Sb}_2\text{Se}_3@\text{C}$      | 29                 | 758.1                                             | $2.8 \times 10^{-16}$                            |

## References:

1. Y. Tian, Z. Sun, Y. Zhao, Y. Zhang, T. Tan, F. Yin, *Journal of Nanoparticle Research* **2019**, 21, 15.
2. W. Luo, J.-J. Gaumet, P. Magri, S. Diliberto, F. Li, P. Franchetti, J. Ghanbaja, L. Mai, *Journal of Energy Chemistry* **2019**, 30, 27.
3. K.-H. Nam, C.-M. Park, *Journal of Power Sources* **2019**, 433, 126639.
4. W. Luo, A. Calas, C. Tang, F. Li, L. Zhou, L. Mai, *ACS Appl Mater Interfaces* **2016**, 8, 35219.
5. Y. Tian, Z. Sun, Y. Zhao, T. Tan, H. Liu, Z. Chen, *Journal of Nanomaterials* **2018**, 2018, 1.
6. J. R. Rodriguez, Z. M. Qi, H. Y. Wang, M. Y. Shalaginov, C. Goncalves, M. Karig, K. A. Richardson, J. Guerrero-Sanchez, M. G. Moreno-Armenta, V. G. Pol, *Nano Energy* **2020**, 68, 104326.
7. Y. Dong, Y. Z. Feng, J. W. Deng, P. B. He, J. M. Ma, *Chinese Chem Lett* **2020**, 31, 909.
